# Supplementary material for: Optimized functional additive enabled stable cathode and anode interfaces for high-voltage all-solid-state lithium batteries with significantly improved cycling performance
Source: Royal Society of Chemistry journal article supplement (doi:10.1039/d2ta03982f), 2022-01-01
Supplement: d2ta03982f1.pdf [file d2ta03982f1.pdf]

## Supporting Information

### Optimized Functional Additive Enabled Stable Cathode and Anode Interfaces for High-voltage All-Solid-State Lithium Batteries with Significantly Improved Cycling Performance

*Liansheng Li<sup>a</sup>, Huanhuan Duan<sup>a</sup>, Leiting Zhang<sup>b</sup>, Yuanfu Deng<sup>a,c,\*</sup>, Guohua Chen<sup>d</sup>*

<sup>a</sup> Guangdong Provincial Key Laboratory of Fuel Cell Technology, School of Chemistry and Chemical Engineering, South China University of Technology, Guangzhou, 510640, Peoples R China;

<sup>b</sup> Department of Chemistry-Ångström Laboratory, Uppsala University, P.O. Box 538, SE-751 21 Uppsala, Sweden;

<sup>c</sup> Guangdong Provincial Research Center of Electrochemical Energy Engineering, South China University of Technology, Guangzhou, 510640, Peoples R China;

<sup>d</sup> Department of Mechanical Engineering, The Hong Kong Polytechnic University, Hung Hom, Kowloon, Hong Kong, Peoples R China.

\* Corresponding author  
E-mail address: chyfdeng@scut.edu.cn.

**Keywords:** Functional additive, Interface stability, High-voltage, All-solid-state battery, Lithium metal battery

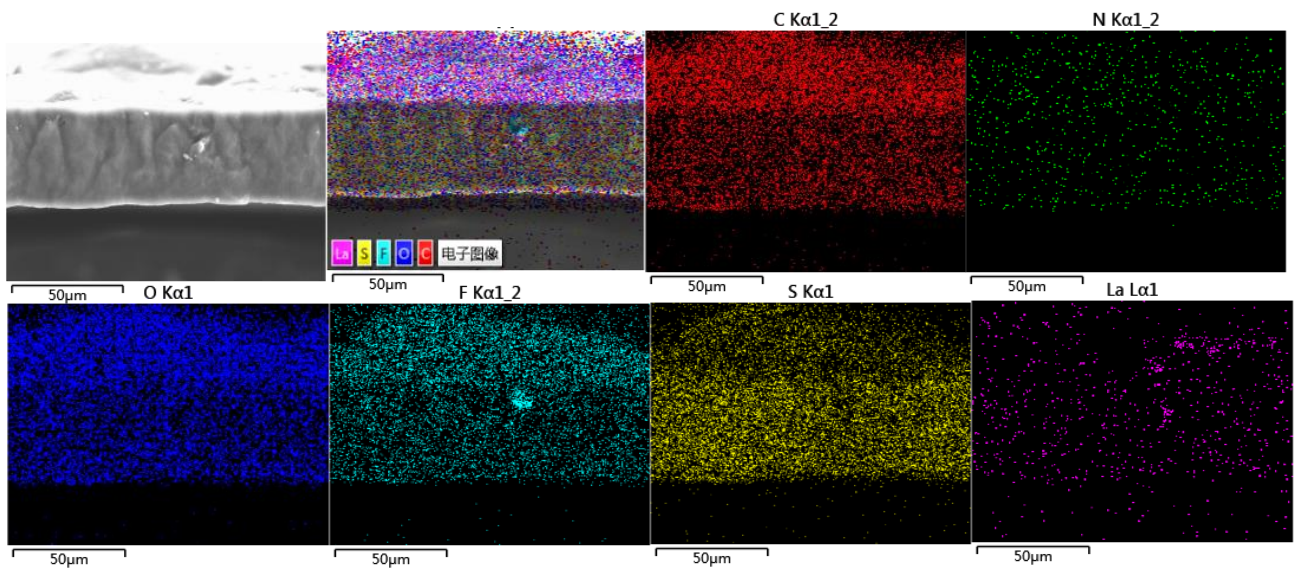

**Fig. S1.** The EDS mappings of the cross-section of the as-prepared additive-free CSE film.

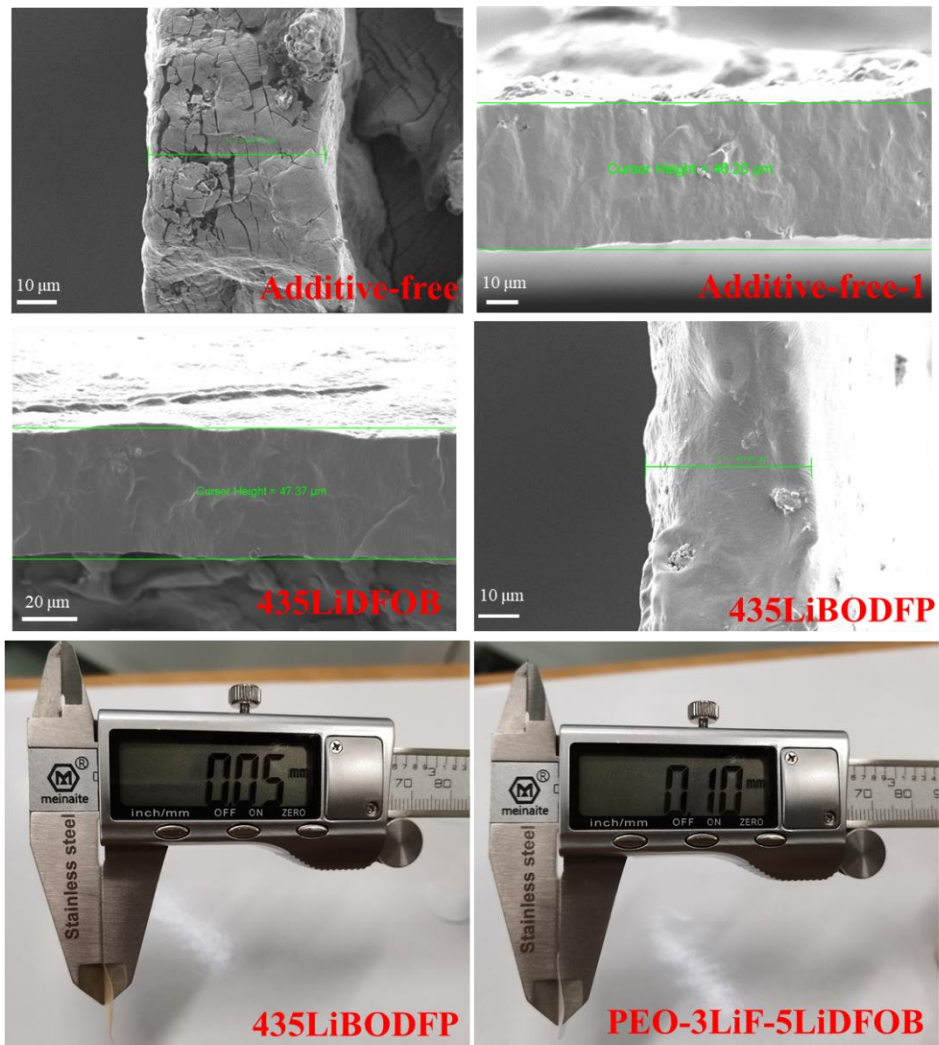

**Fig. S2.** The thicknesses of the as-prepared CSEs.

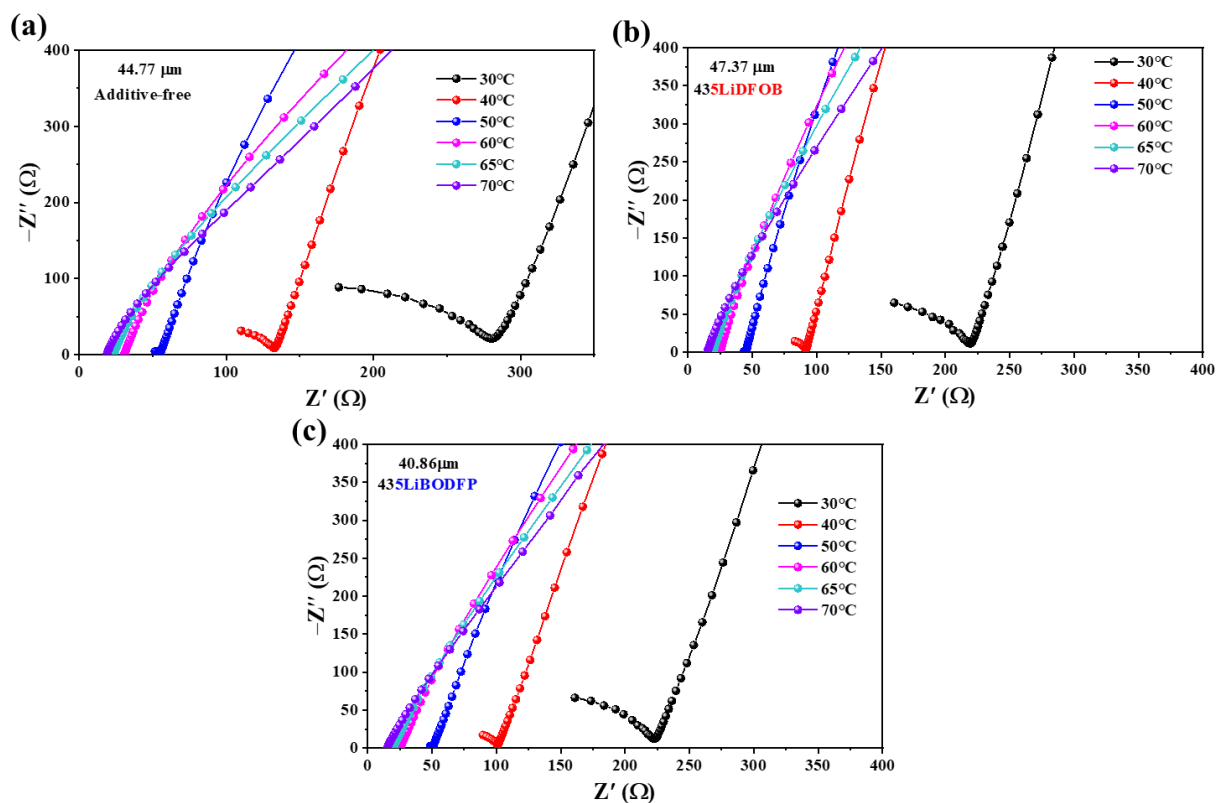

**Fig. S3.** Nyquist plots of (a) additive-free, (b) 435LiDFOB and (c) 435LiBODFP CSEs at different temperatures.

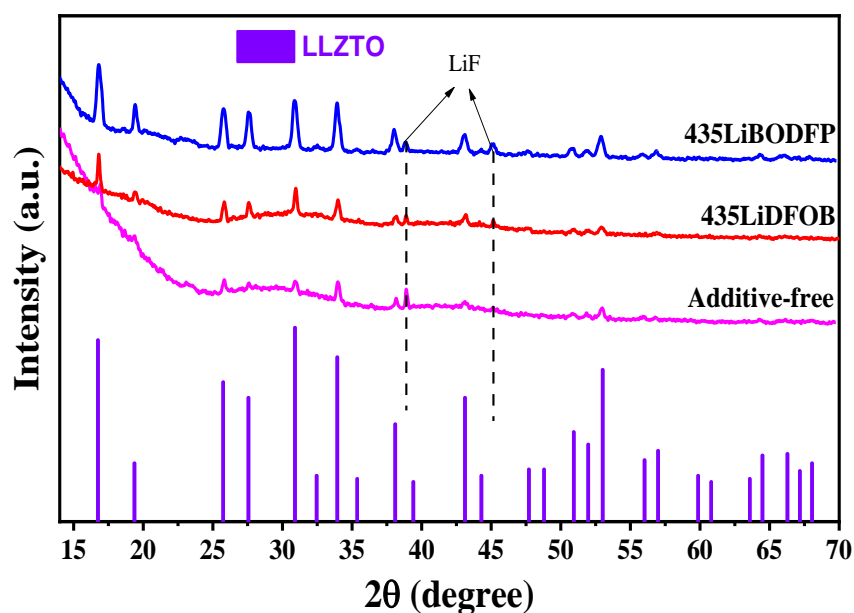

**Fig. S4.** XRD patterns of the as-prepared CSEs with different additives.

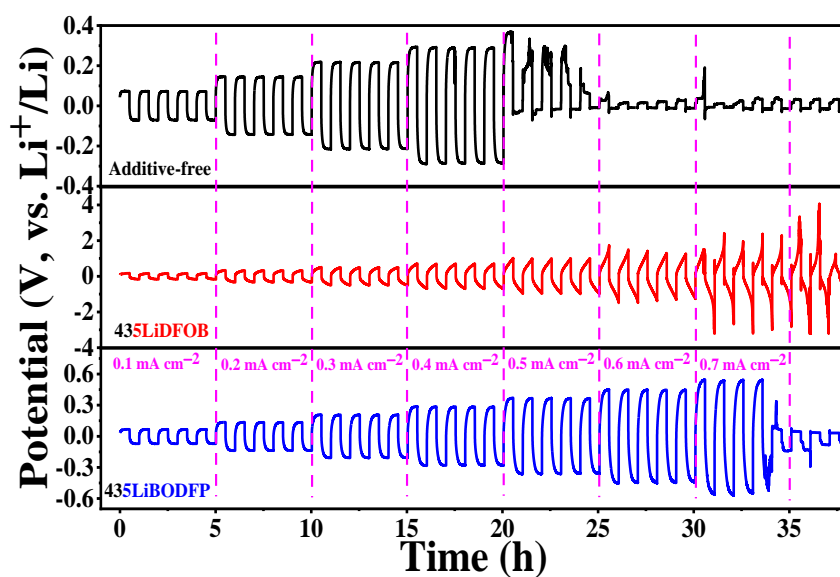

**Fig. S5.** The critical current densities of the Li/Li symmetrical batteries assembled by CSEs with different additives.

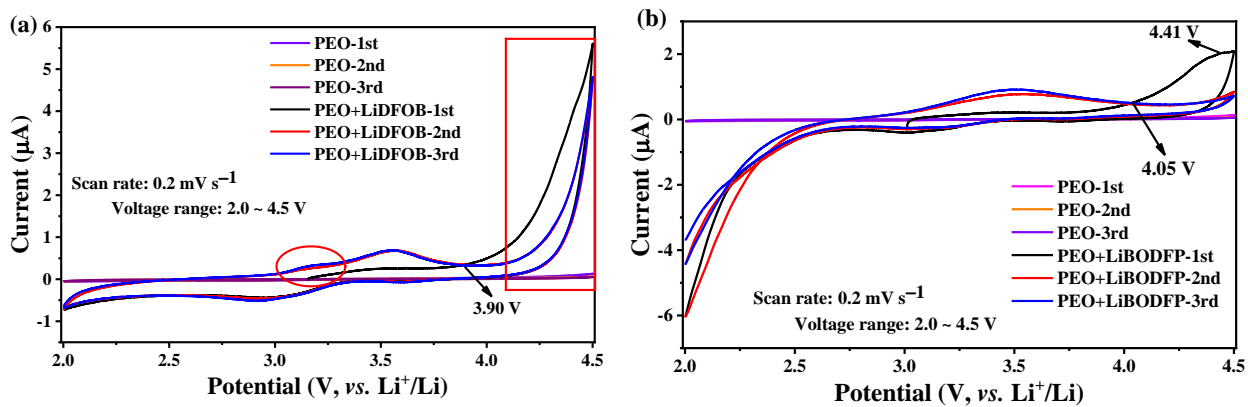

**Fig. S6.** CV results of (a) PEO+LiDFOB and (b) PEO+LiBODFP at a scan rate of 0.2 mV s<sup>-1</sup> in the voltage range of 2.0 ~ 4.5 V.

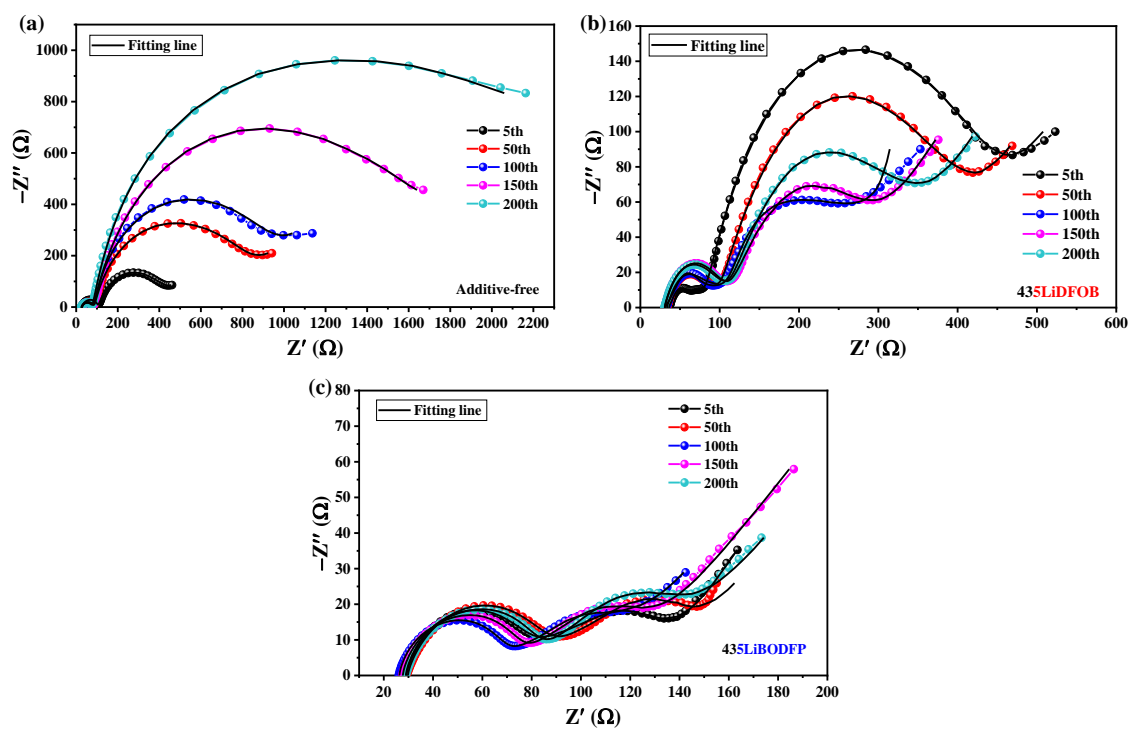

**Fig. S7.** The fitting results of the acquired EIS curves for cells assembled by (a) additive-free, (b) 435LiDFOB and 435LiBODFP CSEs after different cycles.

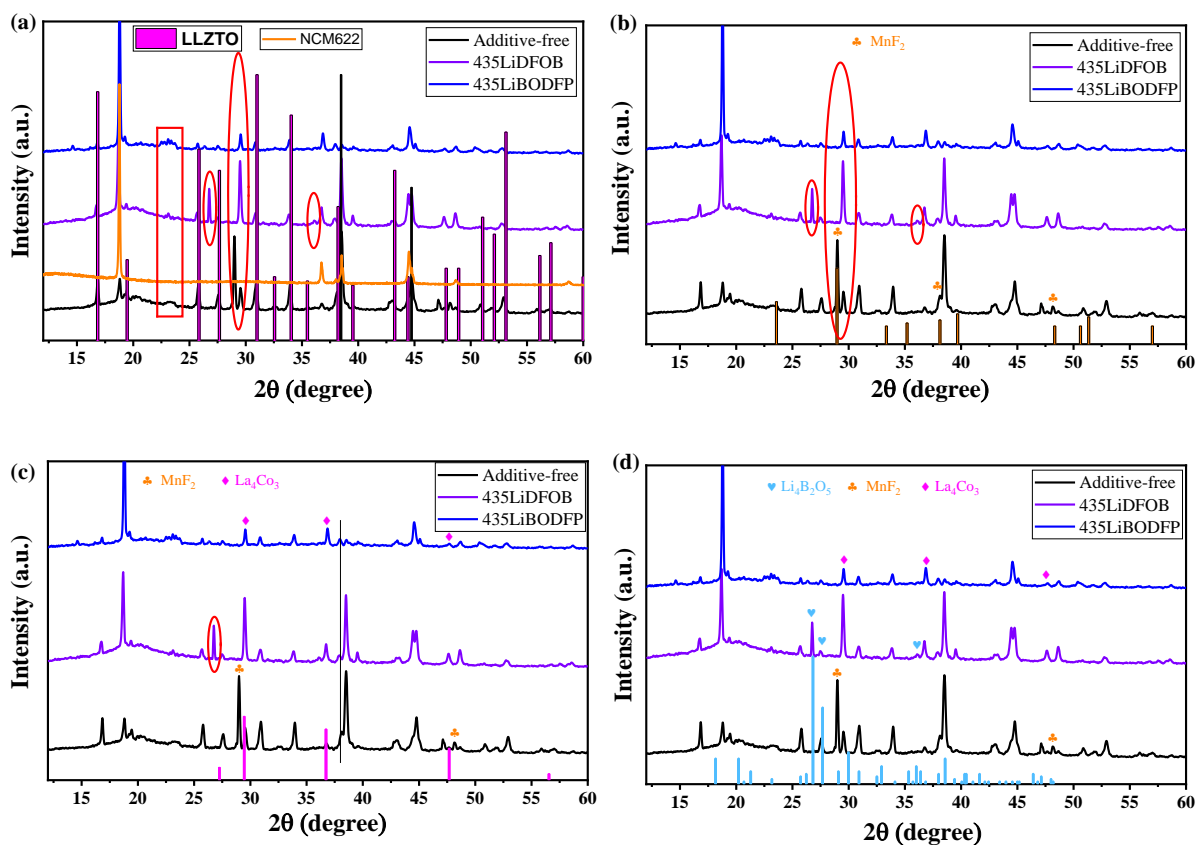

**Fig. S8.** XRD results of the cycled cathodes paired with CSEs consisting of different additives; (a) new appeared peaks marked with red lines, (b) peaks matched with  $\text{MnF}_2$  (PDF#17-0864), (c) peaks matched with  $\text{La}_4\text{Co}_3$  (PDF#21-0262), (d) peaks matched with  $\text{Li}_4\text{B}_2\text{O}_5$  (PDF#18-0719).

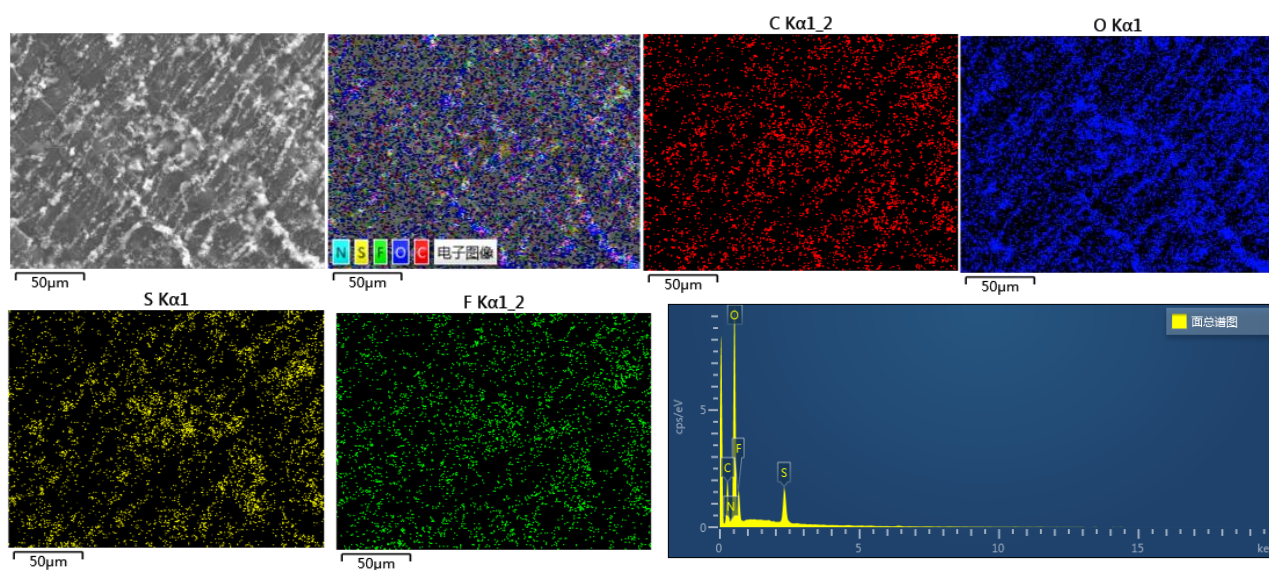

**Fig. S9.** EDX results of the surface of the cycled Li anode paired with additive-free CSE.

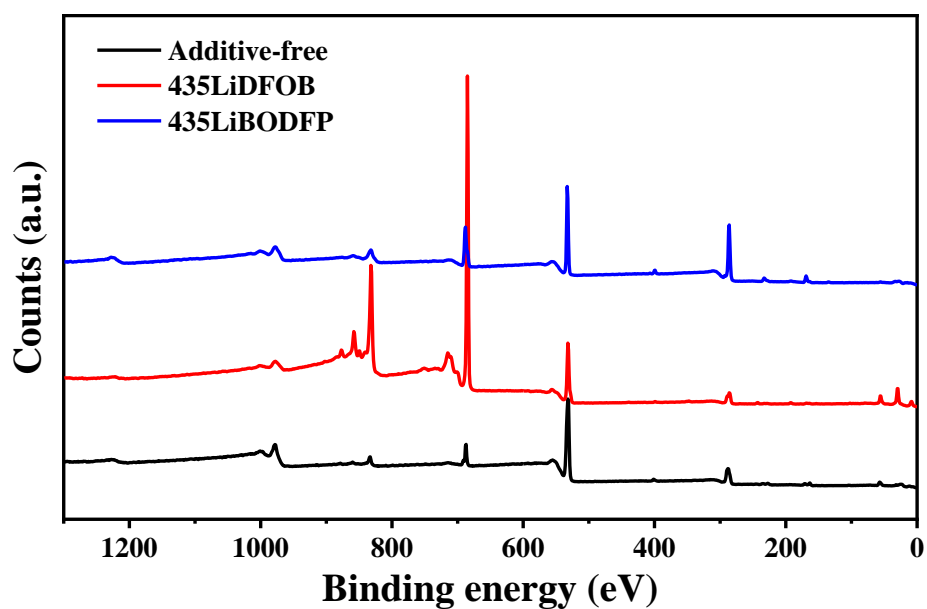

**Fig. S10.** XPS scan results of the cycled Li anodes paired with CSEs with different additives.

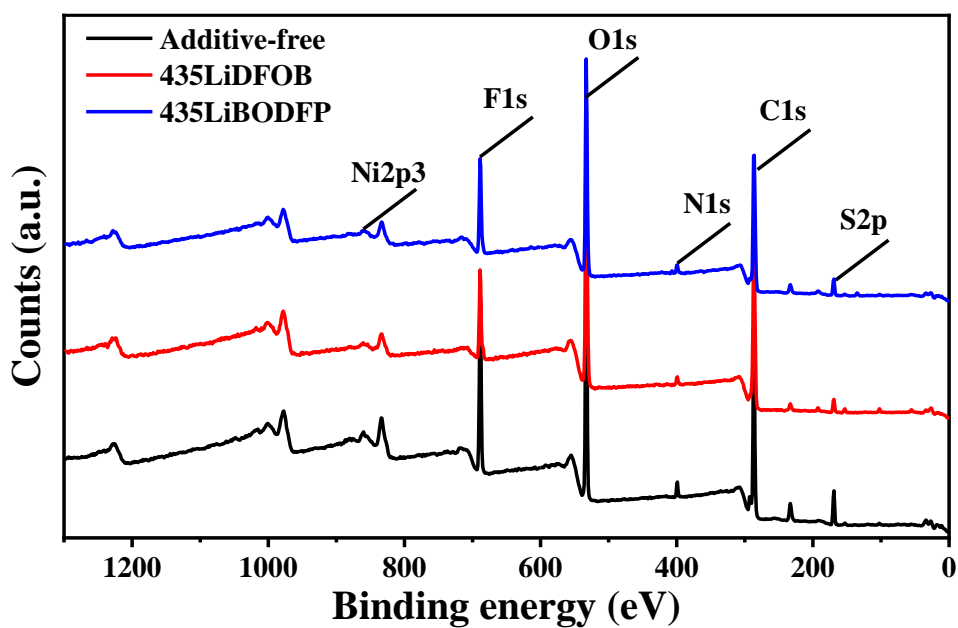

**Fig. S11.** XPS scan results of the cycled cathodes paired with CSEs with different additives.

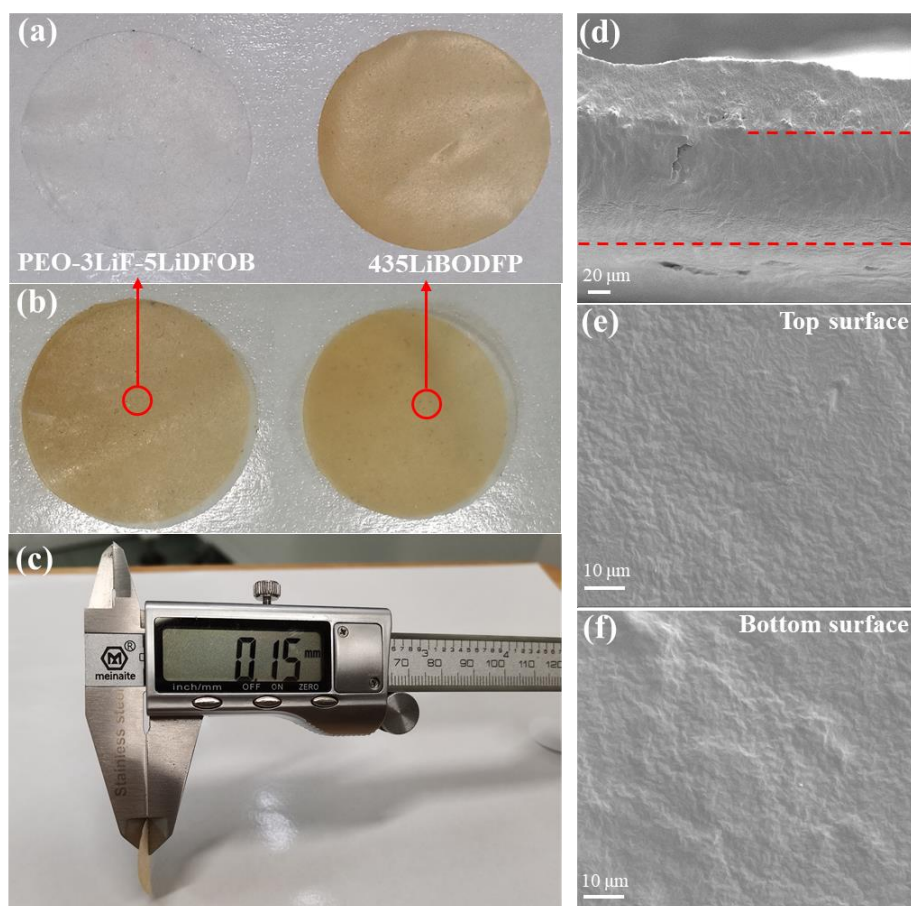

**Fig.S12.** (a-b) Photographs of the as-prepared CSEs, (b) the thickness of the double-layer CSE, and SEM images of the prepared double-layer CSE: (d) the cross-section, (e) top surface and (f) bottom surface.



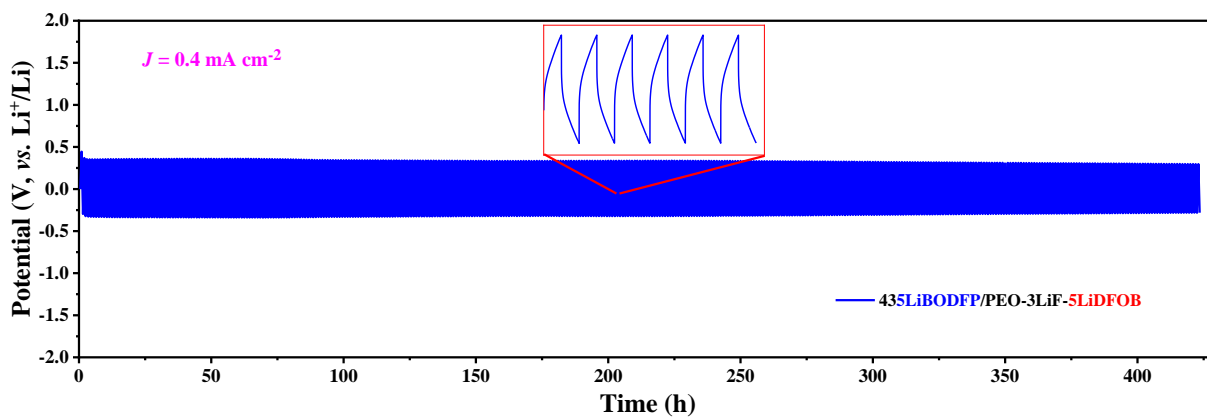

**Fig. S13.** The cycle stability of Li/Li symmetrical cell assembled by 435LiBODFP/PEO-3LiF-5LiDFOB double-layer CSE.

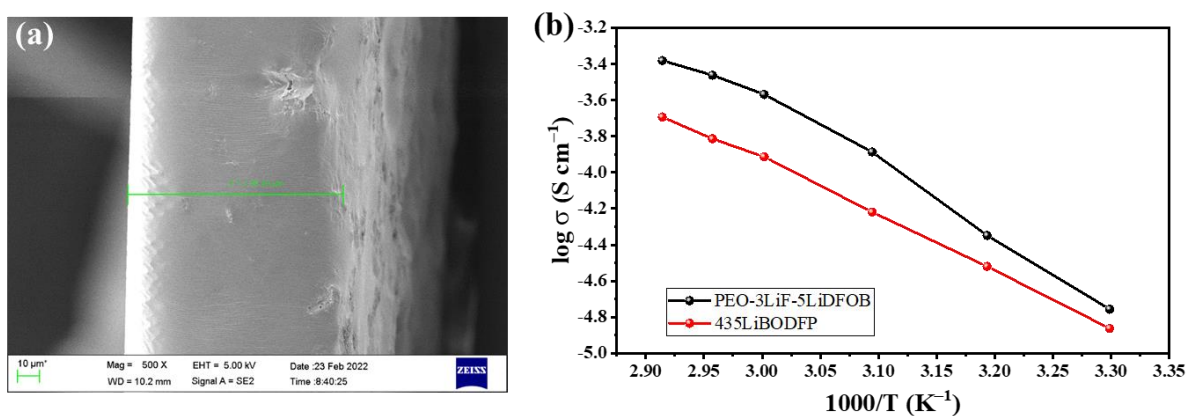

**Fig. S14.** (a) The thickness of the as-prepared PEO-3LiF-5LiBODFP CSE, (b) ionic conductivities of 435LiBODFP and PEO-3LiF-5LiBODFP CSEs at different temperatures.

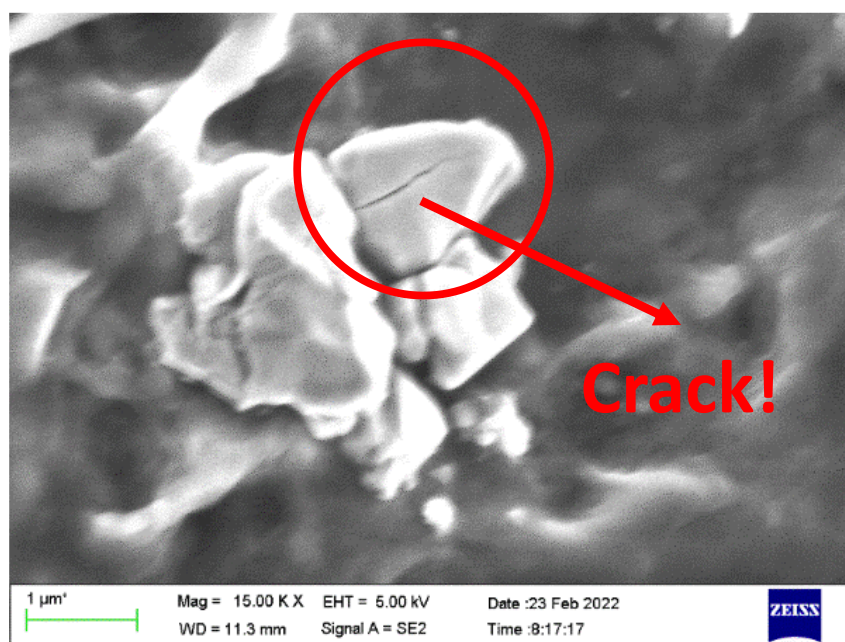

Fig. S15. SEM image of the cycled cathode active material.

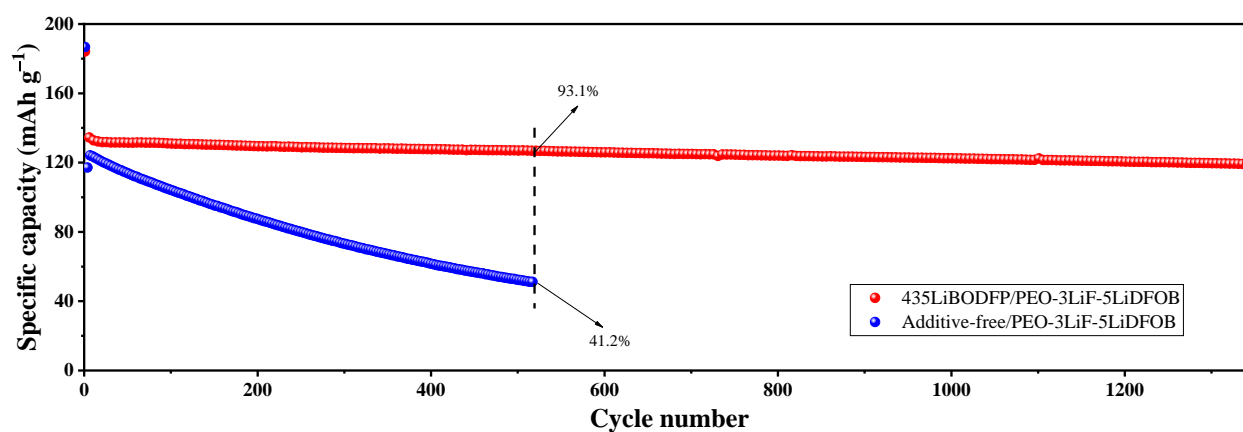

Fig. S16. The cycle stability of cells assembled by double-layer CSEs at 1.0 C

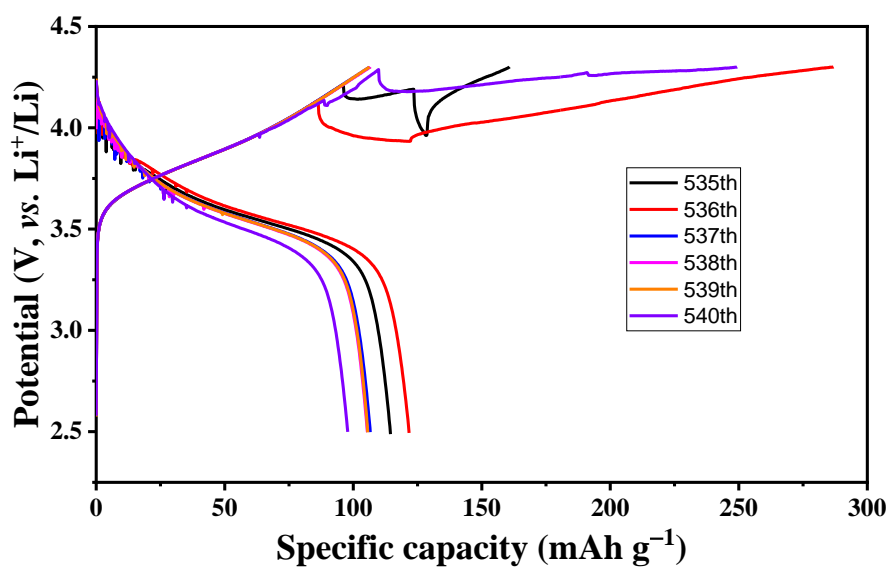

Fig. S17. The charge-discharge curves of SC622/435LiBODFP/Li cell at cycles of 535<sup>th</sup> ~ 540<sup>th</sup>.

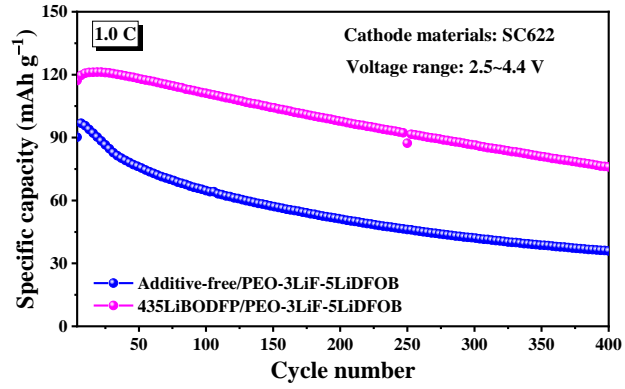

**Fig. S18.** Cycle performance of the assembled cells with double-layer CSE at 1.0 C and in the voltage range of 2.5~4.4 V.

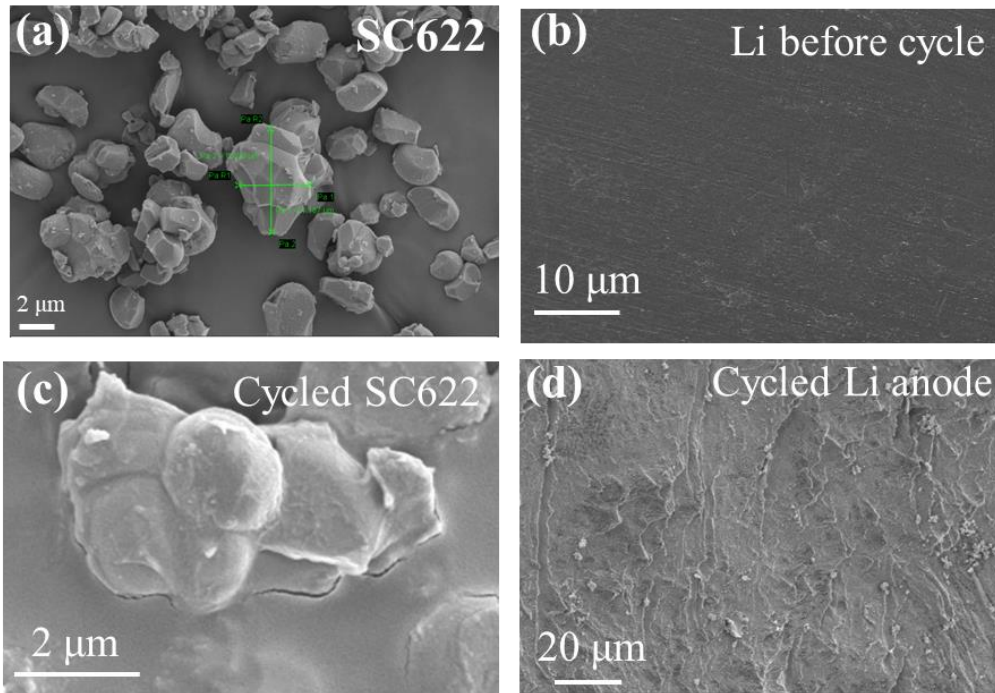

**Fig. S19.** The SEM images of (a) SC622 materials and (b) uncycled Li metal; the SEM images of the cycled electrodes disassembled from cell after 1340 cycles: (c) cycled SC622 cathode and (d) cycled Li anode.

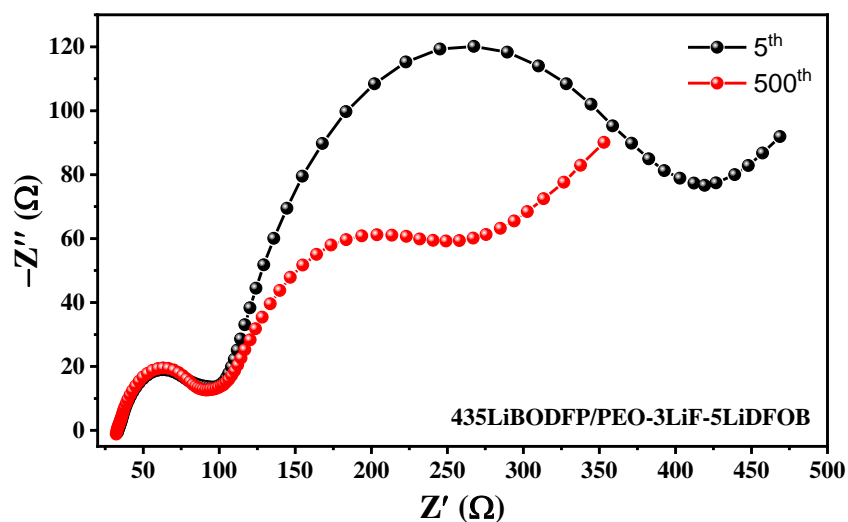

**Fig. S20.** EIS results of cell assembled by 435LiBODFP/PEO-3LiF-5LiDFOB double-layer CSE after different cycles.

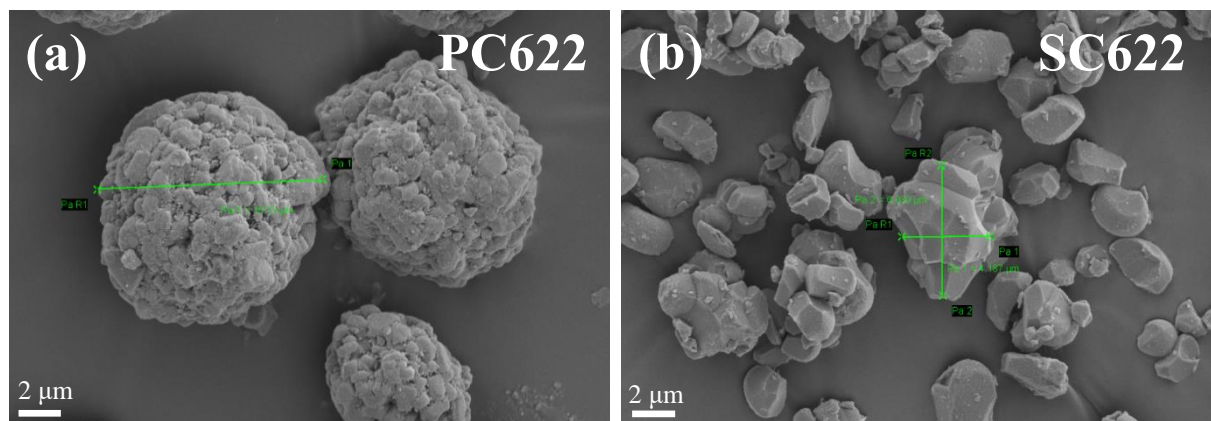

**Fig. S21.** SEM images of the used cathode active materials: (a) polycrystalline  $\text{LiNi}_{0.6}\text{Co}_{0.2}\text{Mn}_{0.2}\text{O}_2$  (PC622) and (b) single crystal  $\text{LiNi}_{0.6}\text{Co}_{0.2}\text{Mn}_{0.2}\text{O}_2$  (SC622).

**Table S1** The fitting results of the cells assembled by CSEs with different additives after different cycles.

| <b>Sample</b> | <b>Cycle number</b> | <b>SE (<math>\Omega</math>)</b> | <b>Cathode interface (<math>\Omega</math>)</b> | <b>Anode interface (<math>\Omega</math>)</b> | <b>Total (<math>\Omega</math>)</b> |
|---------------|---------------------|---------------------------------|------------------------------------------------|----------------------------------------------|------------------------------------|
| Additive-free | 5th                 | 28.11                           | 300.10                                         | 77.80                                        | 406.01                             |
|               | 50th                | 26.15                           | 682.20                                         | 59.47                                        | 767.82                             |
|               | 100th               | 26.35                           | 782.2                                          | 54.07                                        | 862.62                             |
|               | 150th               | 27.06                           | 1611                                           | 58.84                                        | 1696.90                            |
|               | 200th               | 24.27                           | 1993                                           | 59.35                                        | 2076.62                            |
| 435LiBODFP    | 5th                 | 28.44                           | 57.78                                          | 50.37                                        | 136.59                             |
|               | 50th                | 29.09                           | 58.74                                          | 60.56                                        | 148.39                             |
|               | 100th               | 25.85                           | 52.89                                          | 45.7                                         | 124.44                             |
|               | 150th               | 27.08                           | 49.67                                          | 50.41                                        | 127.16                             |
|               | 200th               | 28.54                           | 53.50                                          | 57.20                                        | 139.24                             |
| 435LiDFOB     | 5th                 | 35.13                           | 347.9                                          | 47.15                                        | 430.18                             |
|               | 50th                | 33.62                           | 295.2                                          | 65.40                                        | 394.22                             |
|               | 100th               | 32.5                            | 185.2                                          | 60.9                                         | 278.6                              |
|               | 150th               | 29.66                           | 199.7                                          | 78.65                                        | 308.01                             |
|               | 200th               | 30.24                           | 231.6                                          | 77.96                                        | 339.8                              |
